# Supplementary material for: Enhancement of dielectric performance upto GHz of the composites with polymer encapsulated hybrid BaTiO3–Cu as fillers: multiple interfacial polarizations playing a key role
Source: Royal Society of Chemistry journal article supplement (doi:10.1039/c6ra03469a), 2016-01-01
Supplement: c6ra03469a1.pdf [file c6ra03469a1.pdf]

## Supporting Information

### Enhancement of Dielectric Performance upto GHz of the Composites with Polymer Encapsulated Hybrid BaTiO<sub>3</sub>-Cu as Fillers: Multiple Interfacial Polarizations Playing a Key Role

Chengliang Li,<sup>ab</sup> Shuhui Yu,<sup>\*a</sup> Suibin Luo,<sup>a</sup> Wenhui Yang,<sup>a</sup> Zaochuan Ge,<sup>b</sup> Haitao Huang,<sup>c</sup> Rong Sun,<sup>\*a</sup> Ching-Ping Wong<sup>d</sup>

<sup>a</sup>Center for Advanced Materials, Shenzhen Institutes of Advanced Technology, Chinese Academy of Sciences, Shenzhen, Guangdong 518055, China. E-mail: yuushu@gmail.com; rong.sun@siat.ac.cn; Fax: +86-755-86392299; Tel: +86-755-86392104; +86-755-86392158

<sup>b</sup>College of Material Science and Engineering, Shenzhen University, Shenzhen, Guangdong 518061, China

<sup>c</sup>Department of Applied Physics and Materials Research Center, The Hong Kong Polytechnic University, Hong Kong, China

<sup>d</sup>Department of Electronic Engineering, The Chinese University of Hong Kong, Shatin, NT, Hong Kong, China

The mass and volume fractions of a mixture are respectively the sum of each component. Where the  $m_{\text{BT-Cu}}$ ,  $m_{\text{BT}}$ ,  $m_{\text{Cu}}$ ,  $m_{\text{PVDF}}$ ,  $m_{\text{c}}$ , are the mass of BT-Cu hybrid particles, BT particles, Cu particles, PVDF and BT-Cu/PVDF composites respectively;  $\rho_{\text{BT-Cu}}$ ,  $\rho_{\text{BT}}$ ,  $\rho_{\text{Cu}}$ ,  $\rho_{\text{PVDF}}$ ,  $\rho_{\text{c}}$  stand for the density of BT-Cu hybrid particles, BT particles, Cu particles, PVDF and BT-Cu/PVDF composites,  $V_{\text{BT-Cu}}$ ,  $V_{\text{BT}}$ ,  $V_{\text{Cu}}$ ,  $V_{\text{PVDF}}$ , and  $V_{\text{c}}$  are the volume of BT-Cu hybrid particles, BT particles, Cu particles, PVDF and BT-Cu/PVDF composites respectively,  $t_{\text{pvdf}}$  and  $t_{\text{c}}$  are the thickness of the sample of PVDF and BT-Cu/PVDF composites, wt% is the mass fraction of BT-Cu hybrid particles in BT-Cu/PVDF composites. The volume fraction of BT-Cu (BT-Cu vol%), BT (BT vol%) and Cu (Cu vol%) are calculated according to the following equations:

$$(1) \quad m_{\text{BT}} + m_{\text{Cu}} = m_{\text{BT-Cu}} \rightarrow \rho_{\text{BT}} \cdot V_{\text{BT}} + \rho_{\text{Cu}} \cdot V_{\text{Cu}} = \rho_{\text{BT-Cu}} \cdot (V_{\text{BT}} + V_{\text{Cu}});$$

$$(2) \quad \text{From (1) we can get: } \frac{V_{\text{BT}}}{V_{\text{Cu}}} = \frac{\rho_{\text{Cu}} - \rho_{\text{BT-Cu}}}{\rho_{\text{BT-Cu}} - \rho_{\text{BT}}} \quad \text{and}$$

$$\frac{m_{\text{Cu}}}{m_{\text{BT}}} = \frac{\rho_{\text{Cu}} \cdot V_{\text{Cu}}}{\rho_{\text{BT}} \cdot V_{\text{BT}} + \rho_{\text{Cu}} \cdot V_{\text{Cu}}} = \frac{\rho_{\text{Cu}}}{\rho_{\text{BT}} \frac{V_{\text{BT}}}{V_{\text{Cu}}} + \rho_{\text{Cu}}};$$

$$(3) \quad \text{Mass fraction of Cu in BT-Cu hybrid particles: } wt\%(Cu) = \frac{\frac{1}{\rho_{BT}} - \frac{1}{\rho_{Cu}}}{\frac{\rho_{BT}}{1} - \frac{\rho_{BT-Cu}}{1}};$$

$$(4) \quad \text{Mass fraction of BT in BT-Cu hybrid particles: } wt\%(BT) = 1 - \frac{\frac{1}{\rho_{BT}} - \frac{1}{\rho_{Cu}}}{\frac{\rho_{BT}}{1} - \frac{\rho_{BT-Cu}}{1}};$$

(5) Volume fraction of BT-Cu hybrid particles in BT-Cu/PVDF composites:

$$BT - Cu(vol\%) = \frac{wt\%}{wt\% + \frac{\rho_{BT-Cu} \cdot (1 - wt\%)}{\rho_{PVDF}}};$$

$$(6) \quad \text{The density of PVDF: } \rho_{PVDF} = \frac{4m_{PVDF}}{\pi D_{PVDF}^2 t_{PVDF}};$$

$$(7) \quad \text{The density of BT-Cu/PVDF: } \rho_c = \frac{1}{\frac{wt\%}{\rho_{BT-Cu}} - \frac{1 - wt\%}{\rho_{PVDF}}};$$

(8) Volume fraction of BT in BT-Cu/PVDF:

$$BT(vol\%) = \frac{wt\%(BT) \cdot wt\% \cdot \rho_{BT-Cu} / \rho_{Cu}}{wt\% + \frac{\rho_{BT-Cu} \cdot (1 - wt\%)}{\rho_{PVDF}}};$$

(9) Volume fraction of Cu in BT-Cu/PVDF:

$$Cu(vol\%) = \frac{wt\%(Cu) \cdot wt\% \cdot \rho_{BT-Cu} / \rho_{BT}}{wt\% + \frac{\rho_{BT-Cu} \cdot (1 - wt\%)}{\rho_{PVDF}}}.$$

The reason of inoxidizability of BT-Cu particles lies on the polymer layer capped on the surface of BT-Cu particles, because the thickness of oleic acid layer is extremely thin, it is hardly to detect the existence of this polymer through XRD. So FT-IR was used to analyze the chemical composition of the surface of BT-Cu particles. As is shown in Fig 6, the two strong absorption peaks at 578.6 cm<sup>-1</sup> and 437.8 cm<sup>-1</sup> and absorption at 1442.7 cm<sup>-1</sup> are assigned to the characteristic peaks of BT.

contrast with the spectra of BT powder, the difference of BT-Cu hybrid particles absorption peaks of  $3413.8\text{ cm}^{-1}$  is stretching vibration band of hydroxyl,  $2889.3\text{ cm}^{-1}$  and  $1340.4\text{ cm}^{-1}$  are respectively assigned to stretching vibration band and scissoring vibration band of methylene,  $1110.9\text{ cm}^{-1}$  is the stretching vibration from C-O-C of PEG-4000 repeating unit. These above indicate that polyethylene glycol 4000 was successfully coated on the surface of BT-Cu particles, presenting the BT-Cu hybrid particles with antioxidant properties.

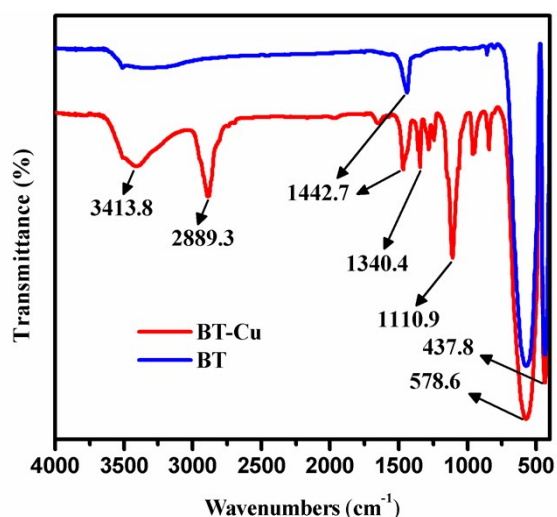

**Fig. S1** FT-IR spectra of oleic acid capped BT-Cu nanoparticles
